# Supplementary material
Source: Springer Nature journal article supplement (https://www.springermedizin.de/resource/supplementary/13023_2012_508_MOESM5_ESM.pdf/9642730)

A

Glucose

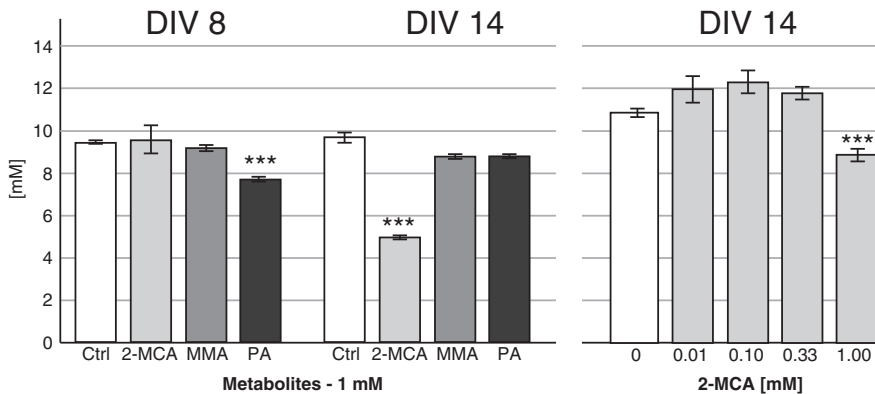

B

Lactate

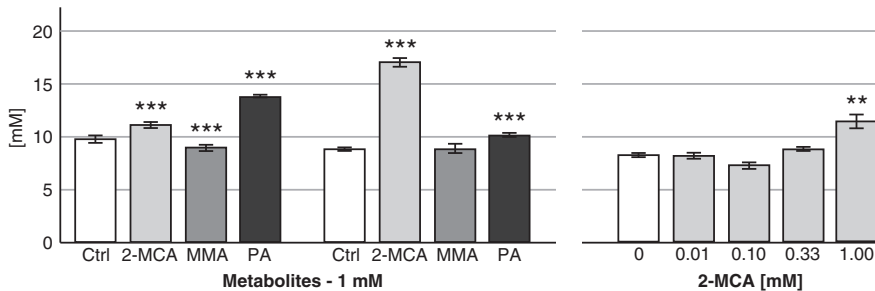

Supplement: MOESM5 [file 9642730]
